# Supplementary material for: Vibrational and impedance spectroscopic analyses of semi-interpenetrating polymer networks as solid polymer electrolytes
Source: Royal Society of Chemistry journal article supplement (doi:10.1039/c7cp00129k), 2017-01-01
Supplement: c7cp00129k1.pdf [file c7cp00129k1.pdf]

# **Vibrational and Impedance Spectroscopic Analysis of Semi- Interpenetrating Polymer Networks as Solid Polymer Electrolytes**

## **(Supporting Information)**

*Nimai Bar, Pratyay Basak\* and Yoed Tsur\**

\* Corresponding author Yoed Tsur, Associate Professor, Wolfson faculty of Chemical Engineering, *Technion*-Israel Institute of Technology, Haifa, 3200003, Israel, Email: [tsur@technion.ac.il](mailto:tsur@technion.ac.il)

\*Corresponding author Pratyay Basak, Senior Scientist & Assistant Professor, Nanomaterials Laboratory, Inorganic & Physical Chemistry Division, Council of Scientific and Industrial Research-Indian Institute of Chemical Technology (CSIR-IICT), Hyderabad, 500 007, India, Phone: +91-40-27193225, Fax: +91-2716-0921. Email: [pratyay@iict.res.in](mailto:pratyay@iict.res.in)

---

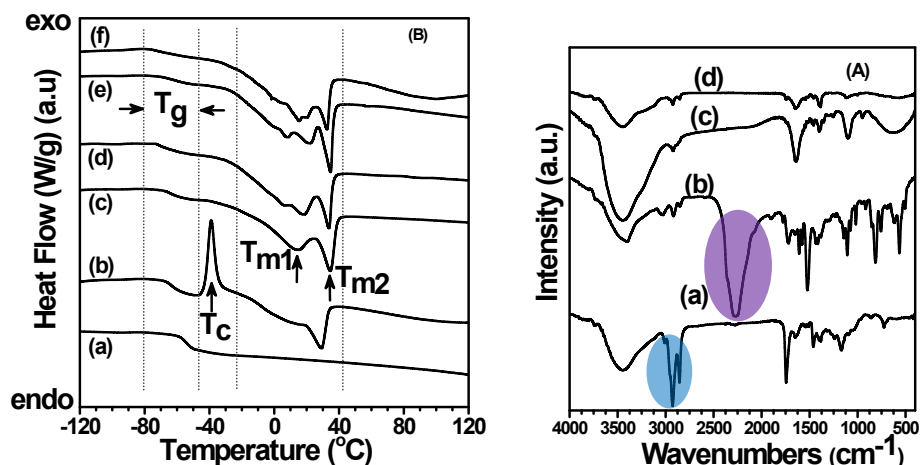

**Figure SI-1: Right:** the *mid*-FTIR stack plots of (a) pure castor oil (CO), (b) 4-4 diphenylmethane diisocyanate (MDI), (c) polyethylene glycol (d) PEO-PU network. The blue colored circle disappeared and violet colored circle appeared after oven curing at 80 °C for 48 hours. **Left:** typical DSC thermograms for the PEO-PU/PEGDME semi-IPN matrices with LiClO<sub>4</sub> as the electrolyte: (a) EO/Li=10, (b) EO/Li=20, (c) EO/Li=30, (d) EO/Li=60, (e) EO/Li=80 and (f) EO/Li=100, data from *J. Phys. Chem. C* **2014**, *118*, 159–174.

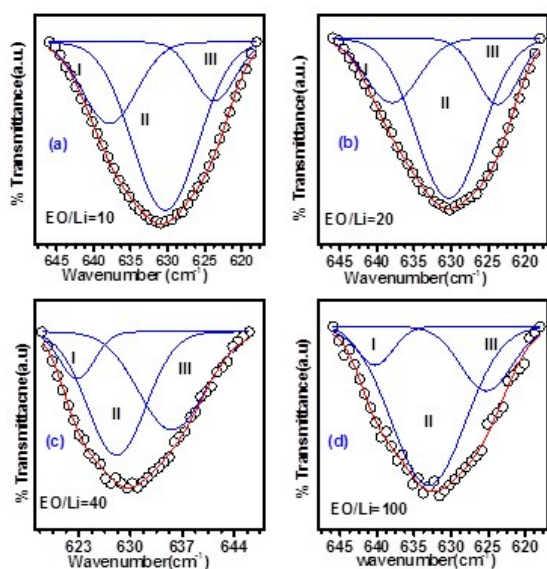

**Figure-SI-2:** Deconvolution FT-IR spectra in perchlorate anion ( $-\text{ClO}_4^-$ ) stretching zone of the semi-IPN solid polymer electrolytes matrix containing different salt concentrations (EO/Li= 10, 20, 40 and 100).

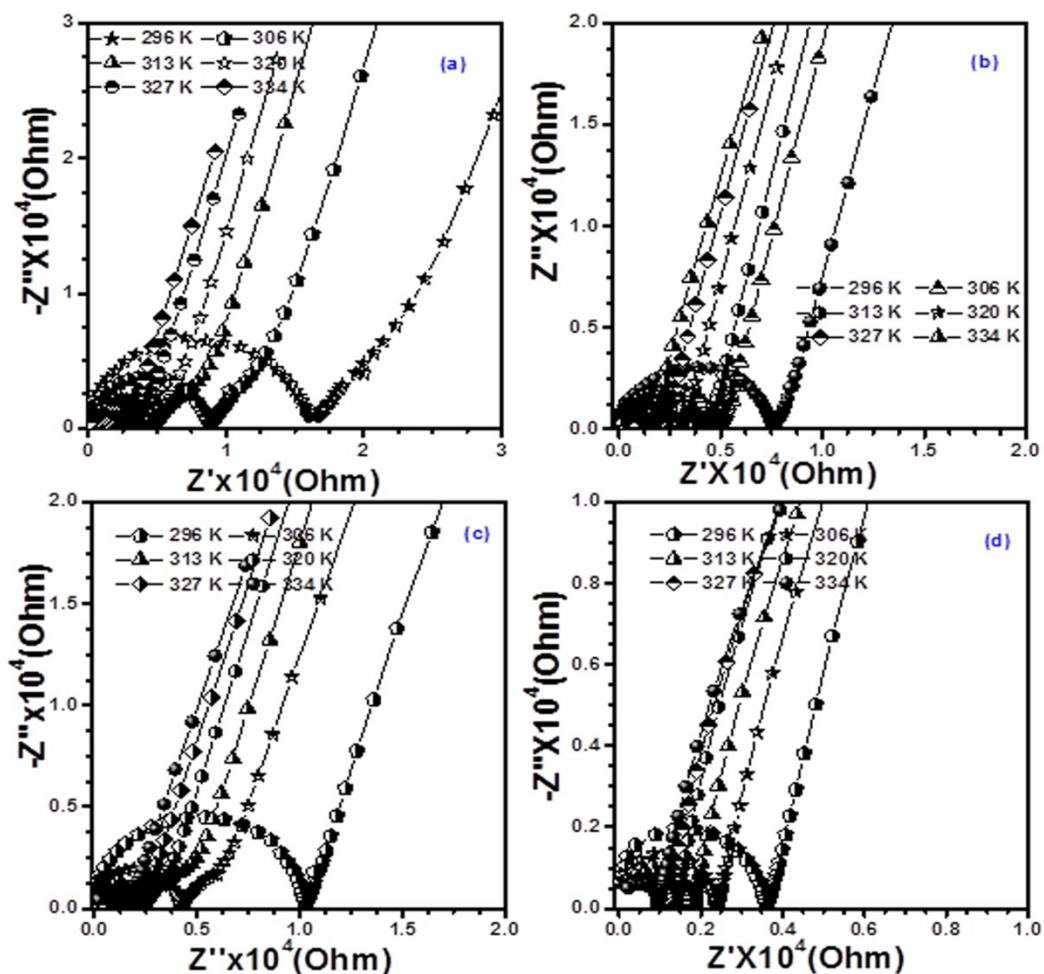

**Figure-SI-3:** Nyquist plots at different temperature of the solid polymer electrolytes at various temperatures. (a) PEO-PU/PEGDME: LiClO<sub>4</sub> (60/40). (b) PEO-PU/PEGDME: LiClO<sub>4</sub> (50/50) at EO/Li ratio 30. (c) PEO-PU/PEGDME: LiClO<sub>4</sub> (40/60) at EO/Li ratio 30. (d) PEO-PU/PEGDME: LiClO<sub>4</sub> (30/70) at EO/Li ratio 30.

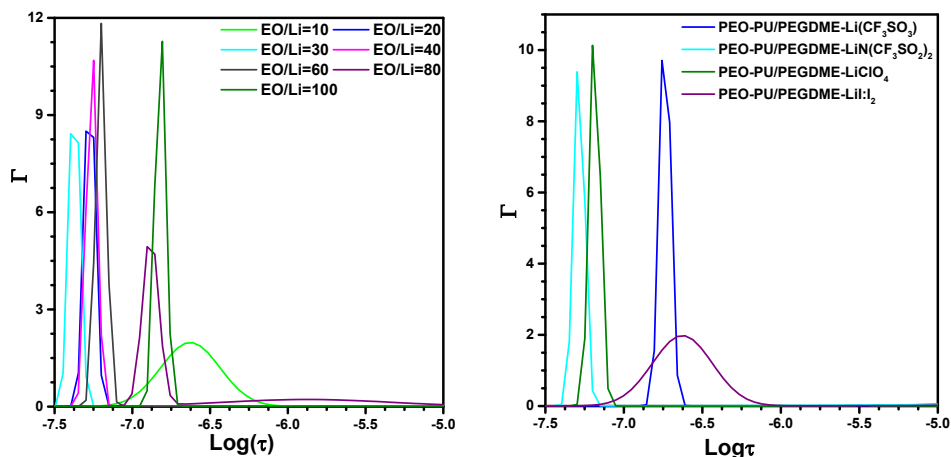

**Figure-SI-4:** DFRT plots for: (a) polymer electrolytes loaded with various concentrations of lithium perchlorate ( $\text{LiClO}_4$ ) salt. (b) polymer electrolytes incorporated with different anion containing lithium salts

**Table-SI-1:** the ionic conductivity ( $\sigma$ ), glass transition temperature ( $T_g$ ), percentage of crystallinity ( $\% \chi$ ), free and contact ions pairs for the solid polymer electrolytes composed of many salt concentrations; 10, 20, 30, 40, 60, 80, and 100.

| Sample name<br>EO/Li | Conductivity<br>( $\sigma$ ) $\times 10^{-3}$ (S/cm) | Glass Transition<br>Temperature( $T_g$ ) | % Crystallinity<br>( $\chi$ ) | Free ion<br>623 $\text{cm}^{-1}$ | Ion pairs<br>632 $\text{cm}^{-1}$ |
|----------------------|------------------------------------------------------|------------------------------------------|-------------------------------|----------------------------------|-----------------------------------|
| 10                   | 0.06                                                 | -54                                      | --                            | 13                               | 62                                |
| 20                   | 0.3                                                  | -63.6                                    | 14.7                          | 37                               | 63                                |
| 30                   | 0.43                                                 | -65                                      | 24.1                          | 43                               | 57                                |
| 40                   | 0.2                                                  | -68.2                                    | 32.3                          | 38                               | 62                                |
| 60                   | 0.12                                                 | -69.2                                    | 33.1                          | 28                               | 72                                |
| 80                   | 0.09                                                 | -70.1                                    | 34.6                          | 30                               | 70                                |
| 100                  | 0.07                                                 | -71.8                                    | 35.2                          | 20                               | 71                                |

Ionic conductivity ( $\sigma$ ), glass transition temperature ( $T_g$ ) and percentage of crystallinity ( $\% \chi$ ) data from *J. Phys. Chem. C* **2014**, *118*, 159–174.

**Table-SI-2:** FT-IR - deconvolution in the ether stretching regime (1180-1000  $\text{cm}^{-1}$ ), peak positions and individual peak areas for the semi-IPN matrix burdened with different salt concentration.

| Sample | Individual peak positions ( $\text{cm}^{-1}$ ) and peak areas (%) |      |       |       |       |       |       |       |       |
|--------|-------------------------------------------------------------------|------|-------|-------|-------|-------|-------|-------|-------|
| EO/Li  | 1025                                                              | 1035 | 1074  | 1094  | 1106  | 1118  | 1136  | 1148  | 1162  |
| 10     | 0.83                                                              | 7.13 | 13.14 | 12.35 | 1.11  | 45.46 | 3.84  | 15.68 | 0.43  |
| 20     | 1.29                                                              | 3.58 | 6.14  | 14.97 | 2.52  | 49.10 | 7.6   | 11.49 | 3.27  |
| 30     | 1.23                                                              | 5.26 | 7.17  | 33.10 | 1.61  | 14.37 | 26.7  | 11.34 | 0.43  |
| 40     | 1.41                                                              | 4.30 | 17.39 | 7.85  | 8.61  | 34.36 | 14.04 | 11.12 | 0.54  |
| 60     | 1.41                                                              | 4.47 | 18.52 | 7.85  | 9.31  | 34.67 | 10.03 | 13.12 | 0.58  |
| 80     | 1.53                                                              | 5.15 | 16.11 | 15.80 | 21.58 | 28.39 | 9.21  | 1.93  | 0.29  |
| 100    | 1.12                                                              | 3.72 | 8.97  | 12.42 | 23.72 | 35.63 | 8.82  | 8.66  | 0.095 |

**Table-SI-3.** FT-IR - deconvolution in the carbonyl stretching zones (1760-1560  $\text{cm}^{-1}$ ) peak positions and individual peak areas for the semi-IPN matrix loaded with different salt concentrations.

| Sample | Individual peak positions ( $\text{cm}^{-1}$ ) with peak areas (%) |      |      |       |       |       |       |       |       |      |
|--------|--------------------------------------------------------------------|------|------|-------|-------|-------|-------|-------|-------|------|
| EO/Li  | 1581                                                               | 1590 | 1601 | 1621  | 1640  | 1659  | 1679  | 1706  | 1726  | 1750 |
| 10     | 0.78                                                               | 2.64 | 9.14 | 19.36 | 19.56 | 14.07 | 17.87 | 4.42  | 7.49  | 4.64 |
| 20     | 0.72                                                               | 2.99 | 8.08 | 23.56 | 23.12 | 15.22 | 13.35 | 7.21  | 4.02  | 1.69 |
| 30     | 0.80                                                               | 3.07 | 7.89 | 32.34 | 23.62 | 11.09 | 11.10 | 7.67  | 3.60  | 1.17 |
| 40     | 0.43                                                               | 1.86 | 5.97 | 15.45 | 25.56 | 6.91  | 22.7  | 10.76 | 6.26  | 4.09 |
| 60     | 0.79                                                               | 4.48 | 9.21 | 15.23 | 17.39 | 9.43  | 14.1  | 8.73  | 12.93 | 7.66 |
| 80     | 0.52                                                               | 2.31 | 6.79 | 12.52 | 12.57 | 9.79  | 24.49 | 15.62 | 10.32 | 5.06 |
| 100    | 0.39                                                               | 2.46 | 7.62 | 18.95 | 17.06 | 21.15 | 11.17 | 11.67 | 6.37  | 3.34 |

**Table-SI-4:** EIS analyzed by ISGP – the HF peak position, normalized area and resistance for the PEO-PU/PEGDME semi-IPN solid polymer electrolyte matrix loaded with different salt concentrations, different Li-salts and polymeric compositions.

| Sample name                                                              | EO/Li | $\log\tau$ | A      | $R_p(\Omega)$ | $R_b=A*R_p(\Omega)$ |
|--------------------------------------------------------------------------|-------|------------|--------|---------------|---------------------|
| PEO-PU/PEGDME(60/40): LiClO <sub>4</sub>                                 | 30    | -5.8584    | 0.9371 | 17529         | 16426               |
| PEO-PU/PEGDME(50/50): LiClO <sub>4</sub>                                 | 30    | -5.956     | 0.9772 | 7639          | 7464                |
| PEO-PU/PEGDME(40/60): LiClO <sub>4</sub>                                 | 30    | -6.4173    | 0.9599 | 6355          | 6100                |
| PEO-PU/PEGDME(30/70): LiClO <sub>4</sub>                                 | 30    | -7.3727    | 0.9330 | 583           | 543                 |
| PEO-PU/PEGDME(30/70): LiI <sub>2</sub>                                   | 10    | -6.4854    | 0.9445 | 3534          | 3337                |
| PEO-PU/PEGDME(30/70): LiN(CF <sub>3</sub> SO <sub>2</sub> ) <sub>2</sub> | 10    | -6.7378    | 0.9792 | 2346          | 2297                |
| PEO-PU/PEGDME(30/70): Li(CF <sub>3</sub> SO <sub>3</sub> )               | 10    | -6.5847    | 0.9363 | 2680          | 2623                |
| PEO-PU/PEGDME(30/70): LiClO <sub>4</sub>                                 | 10    | -6.6274    | 0.9749 | 2880          | 2819                |
| PEO-PU/PEGDME(30/70): LiClO <sub>4</sub>                                 | 20    | -7.2726    | 0.9276 | 771           | 715                 |
| PEO-PU/PEGDME(30/70): LiClO <sub>4</sub>                                 | 30    | -7.3727    | 0.9630 | 583           | 561                 |
| PEO-PU/PEGDME(30/70): LiClO <sub>4</sub>                                 | 40    | -7.2605    | 0.9592 | 893           | 856                 |
| PEO-PU/PEGDME(30/70): LiClO <sub>4</sub>                                 | 60    | -7.2014    | 0.9905 | 976           | 966                 |
| PEO-PU/PEGDME(30/70): LiClO <sub>4</sub>                                 | 80    | -7.0822    | 0.9475 | 1224          | 1159                |
| PEO-PU/PEGDME(30/70): LiClO <sub>4</sub>                                 | 100   | -6.9234    | 1.0302 | 1746          | 1798                |

**Table-SI-5:** ISGP results of semi-IPN solid polymer electrolytes and parameters from ISGP; relaxation time ( $\log\tau$ ), peak area (A) and resistance (R) values are summarized at various temperatures and compositions of the SPEs.

| Sample Name                             | T(K) | Log $\tau$ | A      | $R_p(\Omega)$ | $R=A*R_p(\Omega)$ |
|-----------------------------------------|------|------------|--------|---------------|-------------------|
| PEO-PU/PEGDME(60/40)-LiClO <sub>4</sub> | 296  | -5.8584    | 0.9371 | 17529         | 16426             |
|                                         | 306  | -6.0917    | 0.9507 | 9666          | 9189              |
|                                         | 313  | -6.2989    | 0.9719 | 4689          | 4557              |
|                                         | 320  | -6.4771    | 0.9754 | 3415          | 3330              |
|                                         | 327  | -6.6636    | 0.9617 | 2176          | 2092              |
|                                         | 334  | -6.8161    | 0.9227 | 1621          | 1495              |
| PEO-PU/PEGDME(50/50)-LiClO <sub>4</sub> | 296  | -5.956     | 0.9772 | 7639          | 7464              |
|                                         | 306  | -6.1874    | 0.9660 | 4867          | 4701              |
|                                         | 313  | -6.391     | 0.9764 | 4061          | 3965              |
|                                         | 320  | -6.5428    | 0.9829 | 2927          | 2876              |
|                                         | 327  | -6.6999    | 0.9793 | 2109          | 2065              |
|                                         | 334  | -6.849     | 0.9793 | 1551          | 1518              |
| PEO-PU/PEGDME(40/60)-LiClO <sub>4</sub> | 296  | -6.4173    | 0.9599 | 6355          | 6100              |
|                                         | 306  | -6.6224    | 0.9588 | 3690          | 3537              |
|                                         | 313  | -6.8067    | 0.9715 | 1982          | 1925              |
|                                         | 320  | -6.9458    | 1.0165 | 1446          | 1460              |
|                                         | 327  | -7.0861    | 0.9242 | 1085          | 1002              |
|                                         | 334  | -7.2027    | 0.9822 | 827           | 812               |

Synthetic scheme for the semi-IPN electrolytes

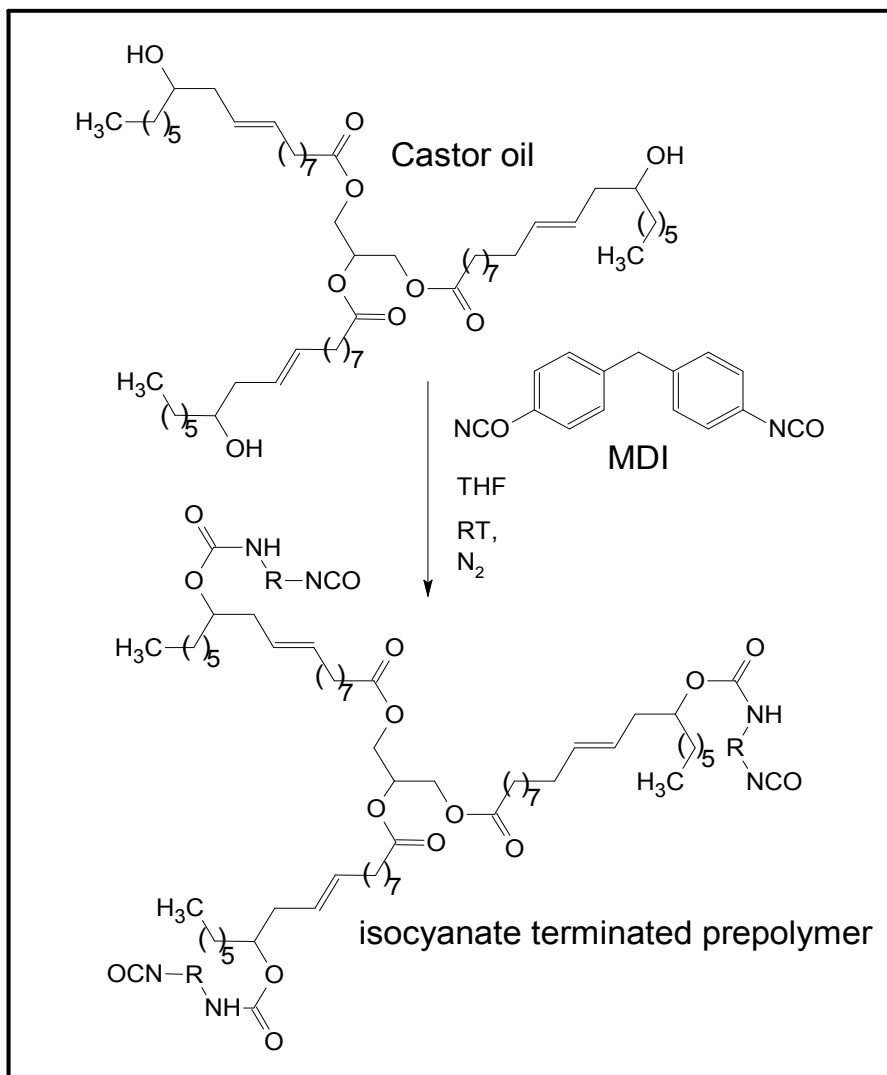

**Scheme 1.** Reaction of castor oil and diphenylmethane-4-4'-diisocyanate to give an isocyanate-terminated prepolymer network in the first step of the reaction.

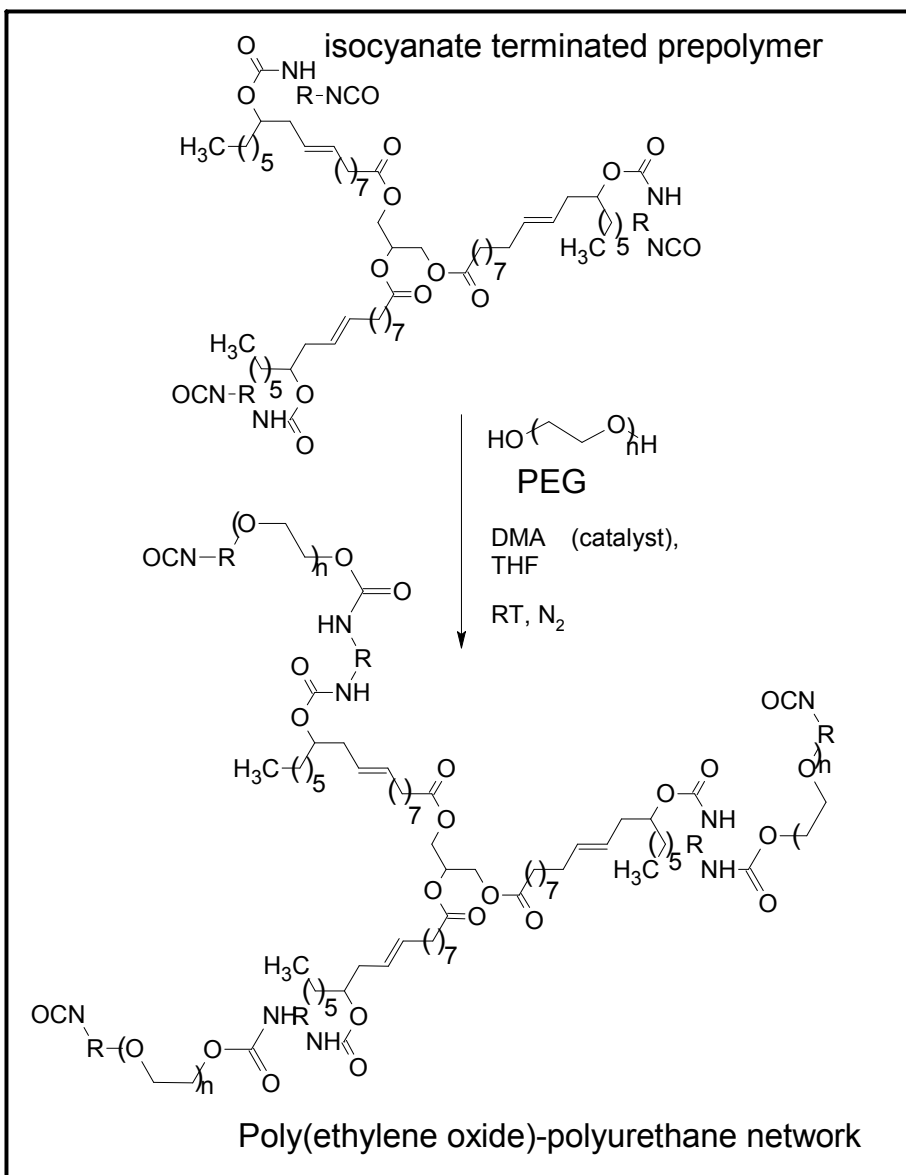

**Scheme 2.** Reaction of isocyanate-terminated prepolymer with poly(ethylene glycol) to form poly(ethylene glycol)-polyurethane networks



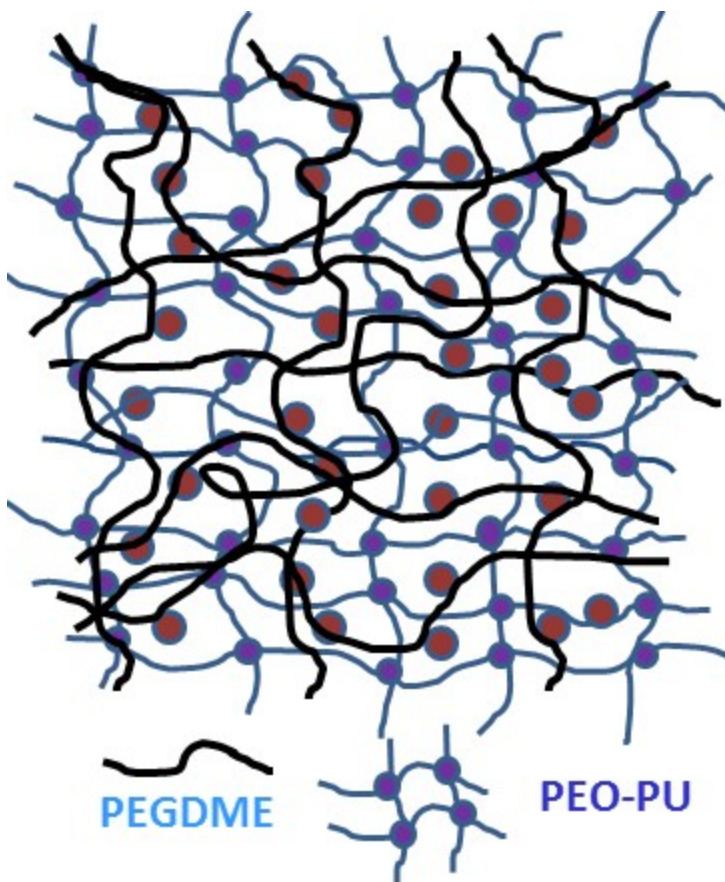

**Scheme 3.** A schematic representation of Li-ion solvation in PEO-PU/PEGDME solid polymer electrolytes matrix.
